# Supplementary material
Source: HighWire-hosted journal article supplement (https://bmjopen.bmj.com/content/8/6/e017858)
Supplement: inline-supplementary-material-1 [file inline-supplementary-material-1.pdf]

***Example of Full Search Strategy (used for Medline)***

#1: resilience.tw

#2: resiliency.tw

#3: #1 OR #2

#4: training.tw

#5: intervention.tw

#6: #4 OR #5

#7: #3 AND #6
