# Supplementary material
Source: HighWire-hosted journal article supplement (https://bmjopen.bmj.com/content/8/6/e017858)

Supplementary Figure 1: Funnel plot examining for evidence of publication bias.

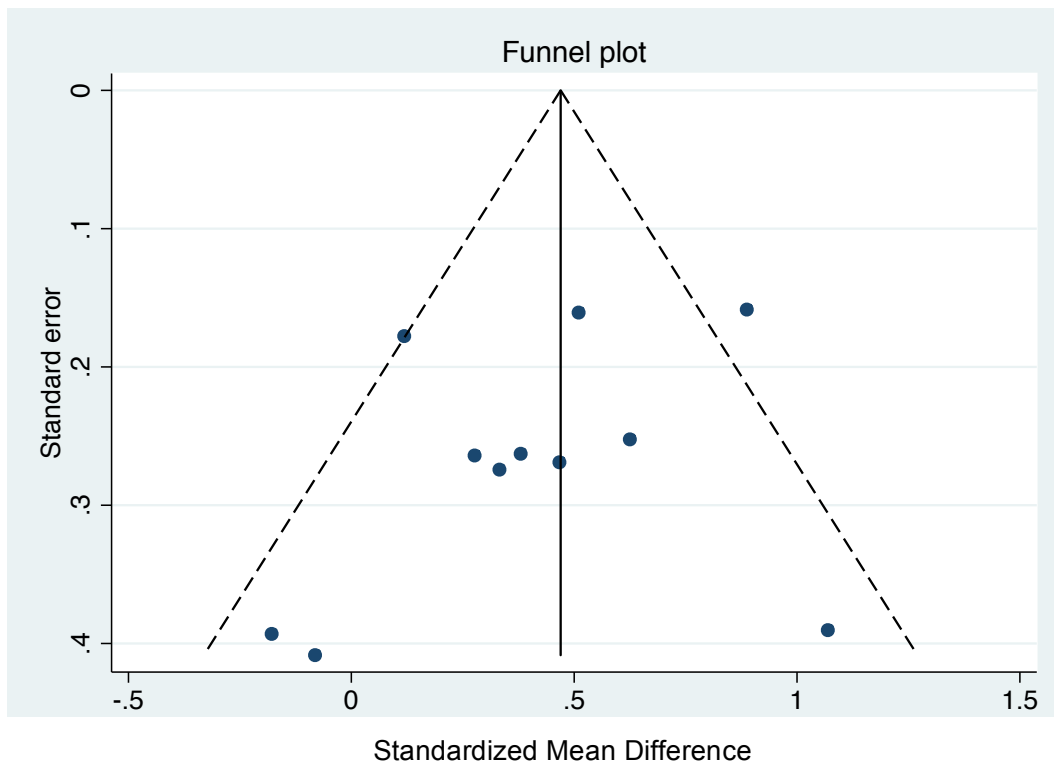

Supplement: inline-supplementary-material-3 [file inline-supplementary-material-3.pdf]
